# Supplementary material for: Microstructure, vibrational and visible emission properties of low frequency ultrasound (42 kHz) assisted ZnO nanostructures
Source: Royal Society of Chemistry journal article supplement (doi:10.1039/c5ra27147a), 2016-01-01

### Supplementary Figures

**Figure S1:** Molecular structure of solvents (a) Ethanol, (b) Methanol, (c) Isopropanol and (d) 1-Butanol.

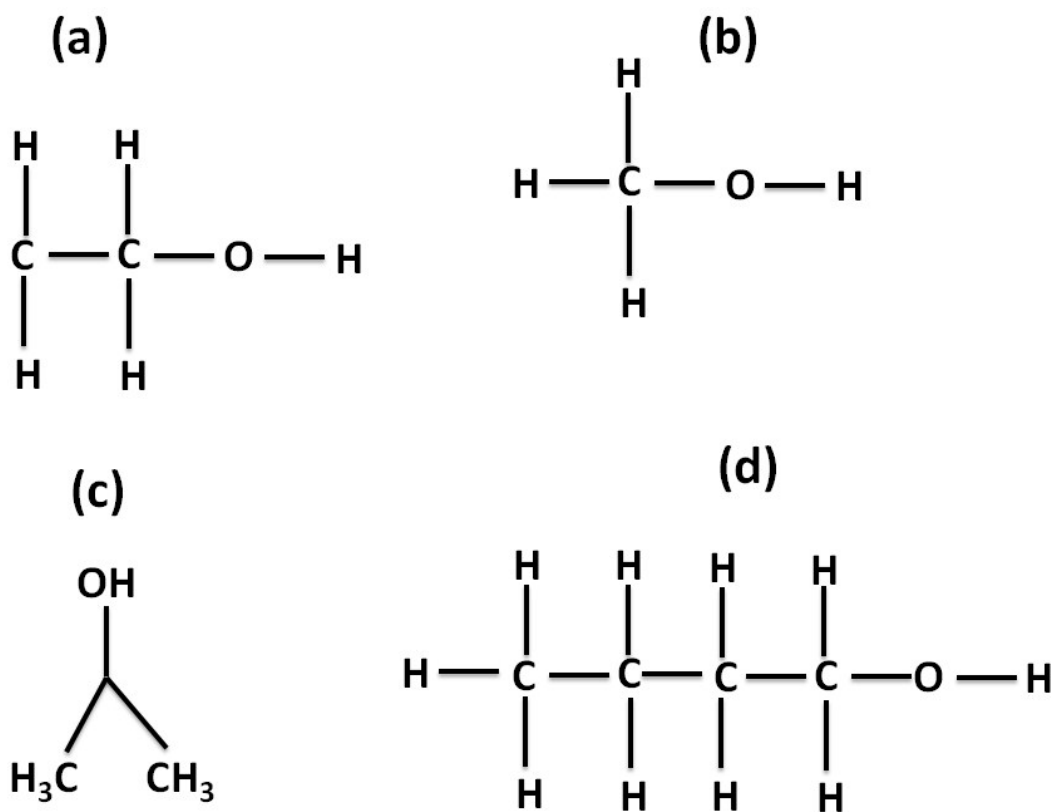

**Figure S2:** Particle size distribution curve of ZnO using solvents (a) Isopropanol, (b) Ethanol, (c) 1-Butanol and (d) Methanol. The ZnO prepared using water as a solvent exhibits triangular shape structures and the length of the particle is around~360 nm.

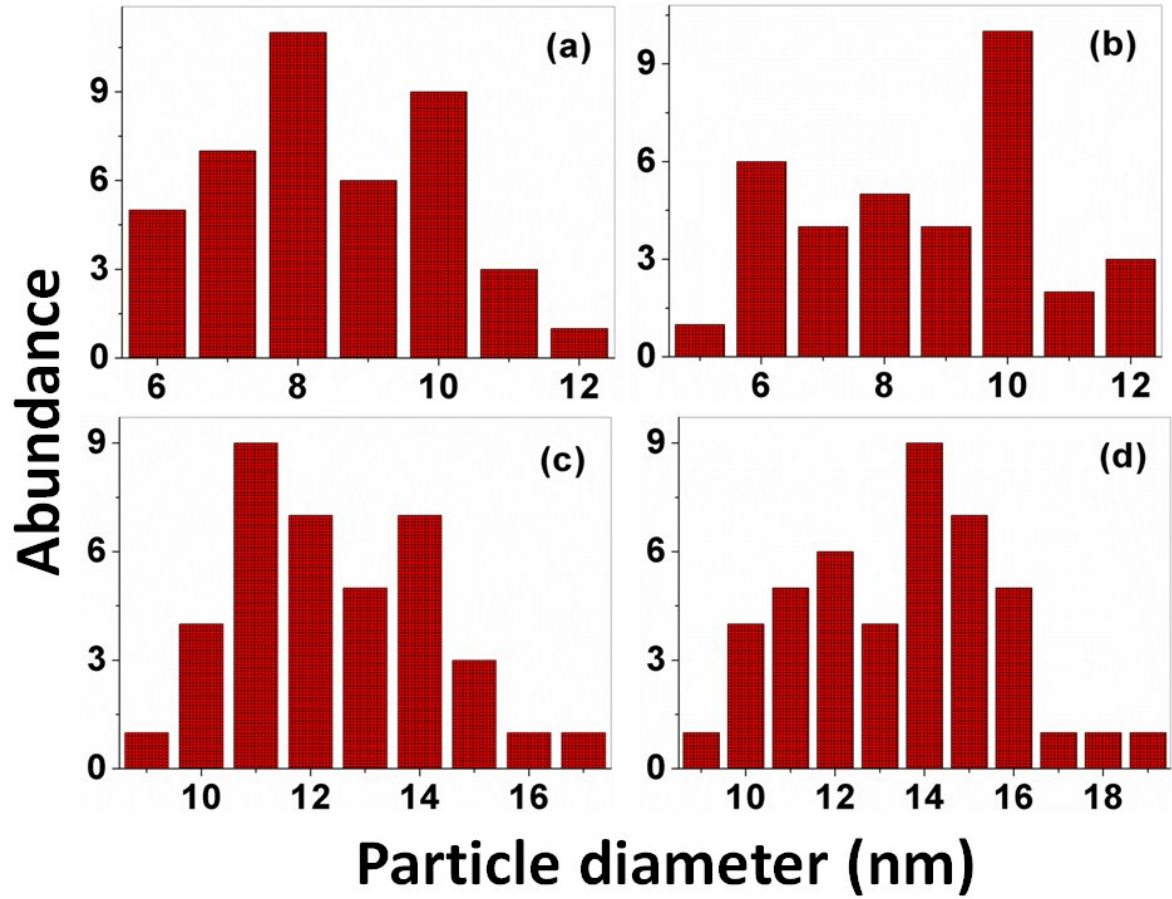

Figure S3 The W-H analysis of prepared ZnO nanostructures assuming UDM.

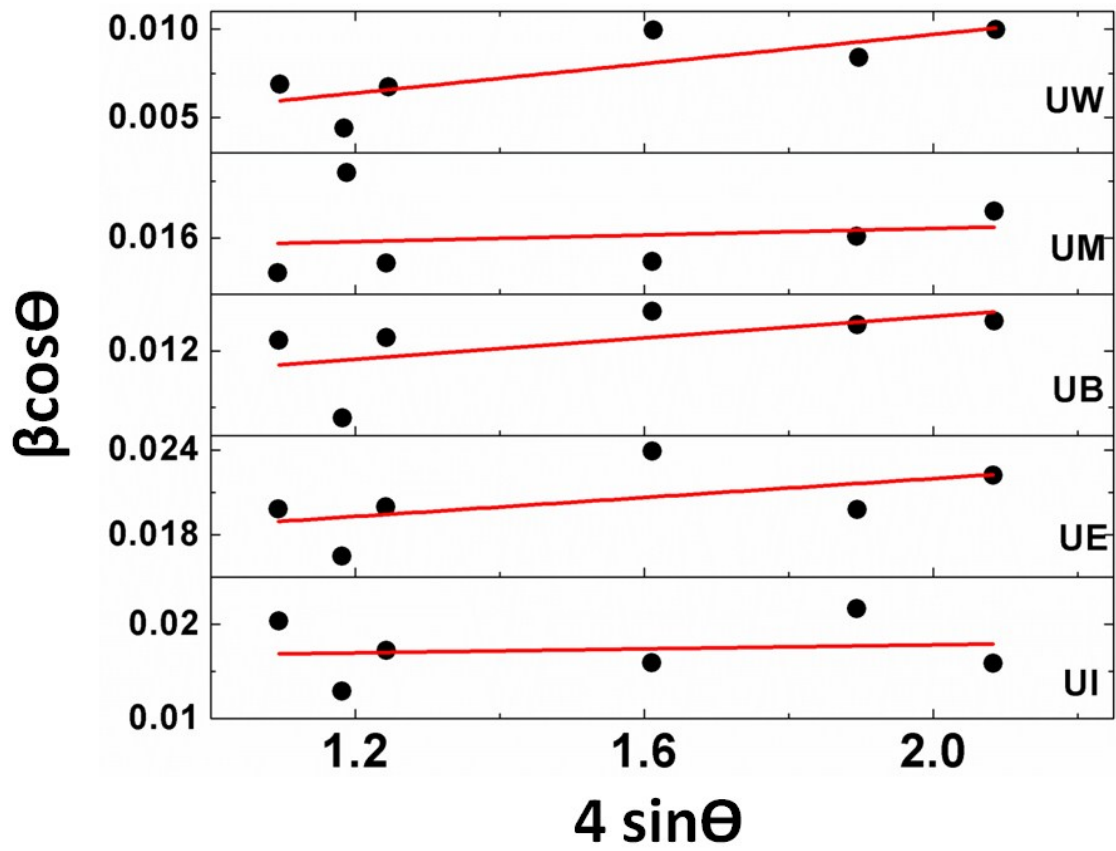

**Figure S4** The modified form of W–H analysis of prepared ZnO nanostructures assuming UDSM.

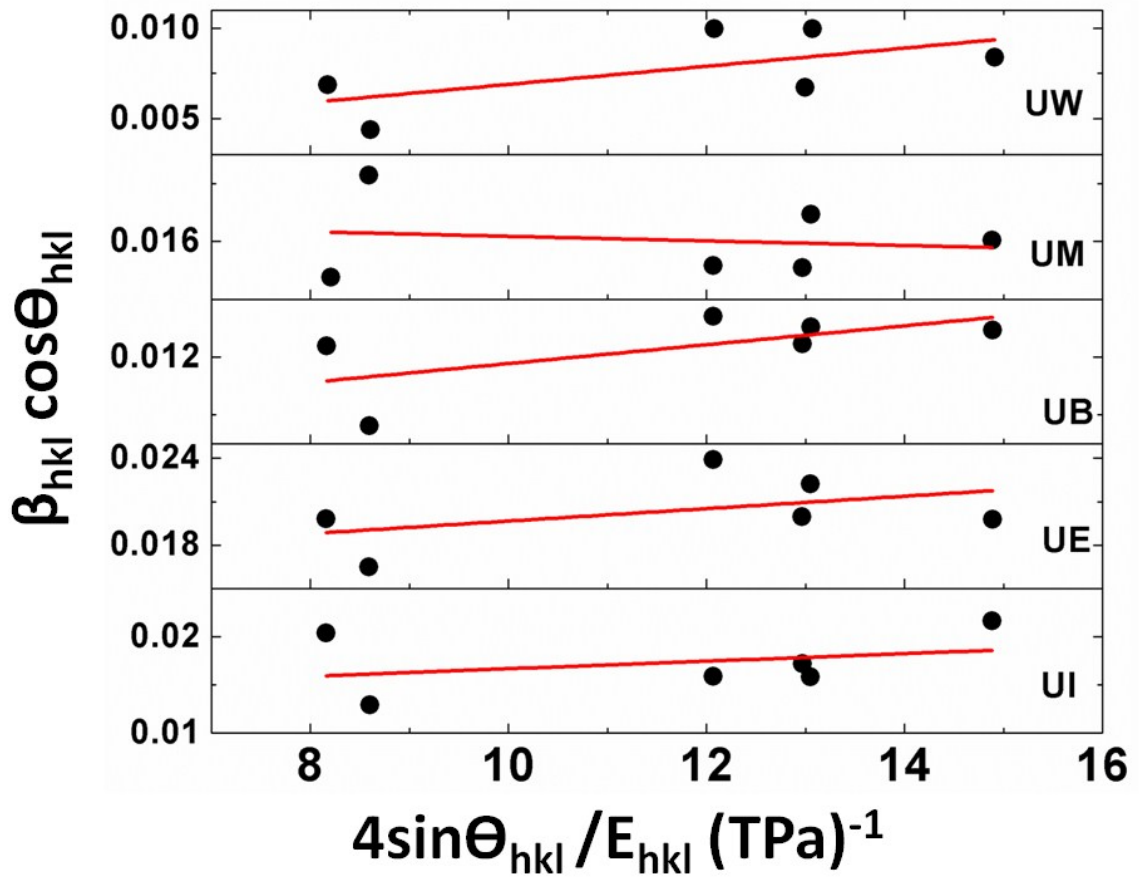

**Figure S5** The modified form of W–H analysis assuming UDEDM of prepared ZnO nanostructures.

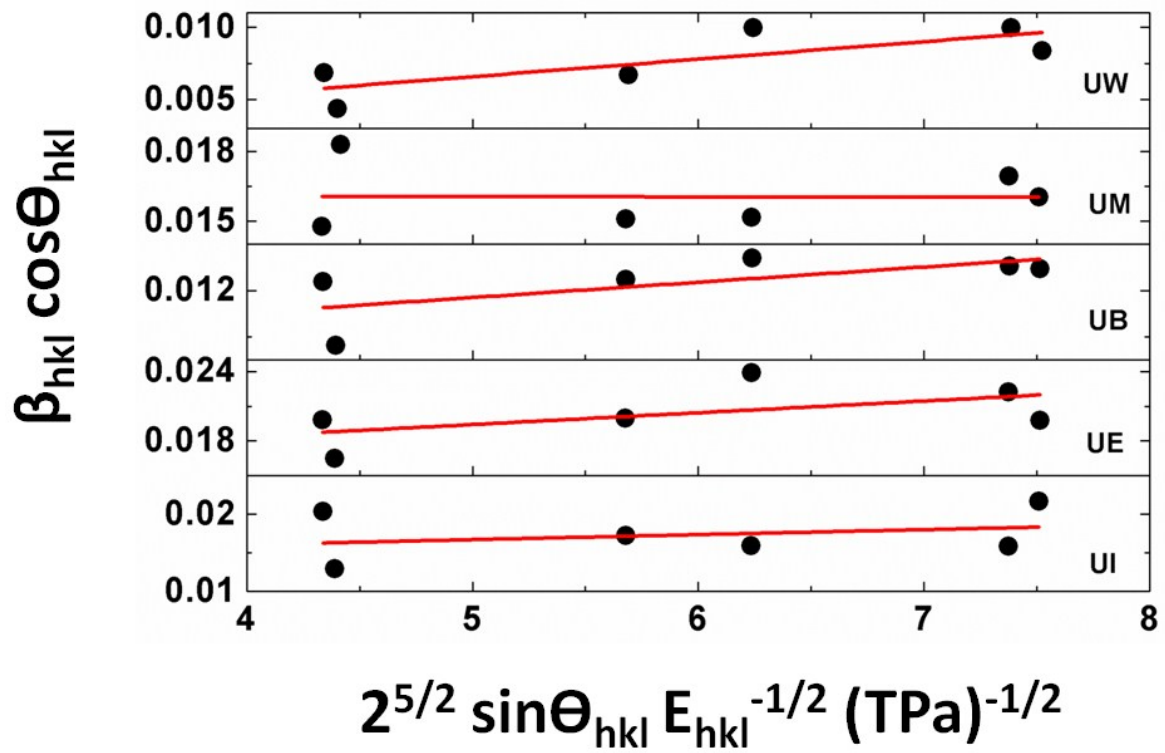

**Figure S6** Band gap versus particle radius calculated from Eq. (17) which clearly reveals that band gap of the material is increased as the particle size reduces into few nm regime.

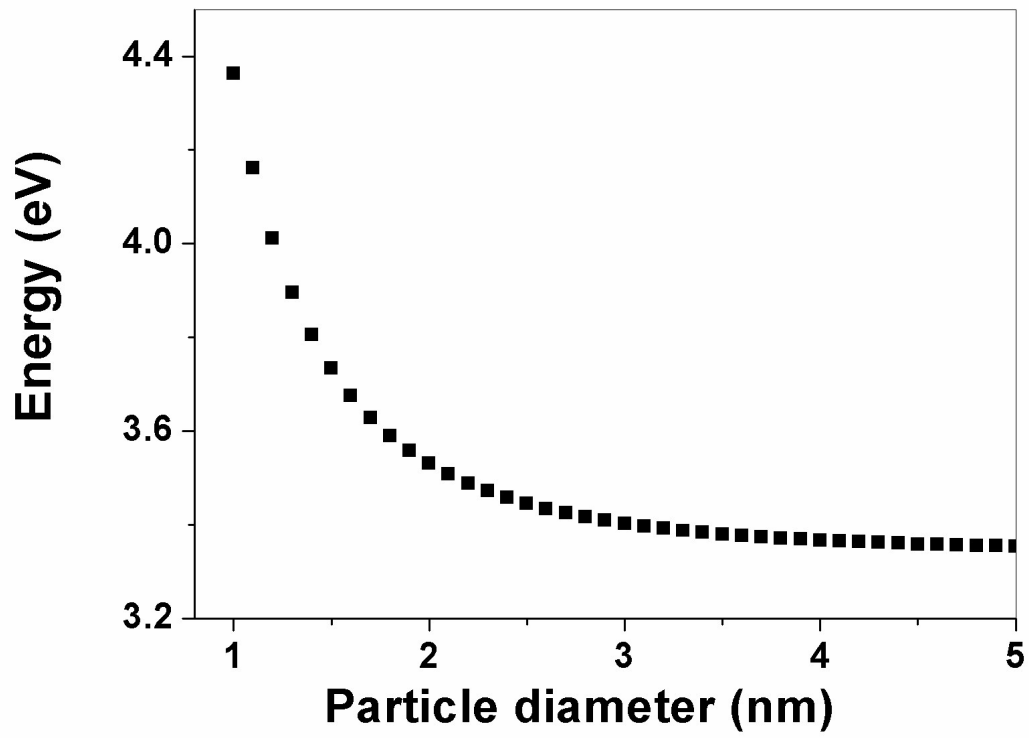

Supplement: c5ra27147a1.pdf [file c5ra27147a1.pdf]
